# Supplementary material for: SARS-CoV-2 Saliva Mass Screening in Primary Schools: A 10-Week Sentinel Surveillance Study in Munich, Germany
Source: MDPI journal article supplement (doi:10.3390/diagnostics12010162), 2022-01-11
Supplement: s1 [file s1]

**Supplementary Table S3:** Aggregated results of an online questionnaire on overall study concept evaluation. The survey was completed by each school's principal after study week 10. Survey participation rate was 100%. Absolute numbers and percentages (%) are displayed.

|                                                                                                                                                                                                        | Number of primary schools (n=17) |
|--------------------------------------------------------------------------------------------------------------------------------------------------------------------------------------------------------|----------------------------------|
| Salivette-testing influenced the feeling of safety as follows: The feeling of safety was ...                                                                                                           |                                  |
| 5 – very much increased                                                                                                                                                                                | 8 (47%)                          |
| 4 – much increased                                                                                                                                                                                     | 7 (41%)                          |
| 3 – increased                                                                                                                                                                                          | 2 (12%)                          |
| 2 – unchanged                                                                                                                                                                                          |                                  |
| 1 – decreased                                                                                                                                                                                          |                                  |
| On a scale from 1 (“very bad”) to 5 (“very good”) I would rate the test concept and the handling of the Salivettes as follows:                                                                         |                                  |
| 5 – very good                                                                                                                                                                                          | 14 (82%)                         |
| 4 – good                                                                                                                                                                                               | 3 (18%)                          |
| 3 – indifferent                                                                                                                                                                                        |                                  |
| 2 – bad                                                                                                                                                                                                |                                  |
| 1 – very bad                                                                                                                                                                                           |                                  |
| In school grades I would rate the test concept and the handling of the Salivettes as follows:                                                                                                          |                                  |
| 5 – very good                                                                                                                                                                                          | 15 (88%)                         |
| 4 – good                                                                                                                                                                                               | 2 (12%)                          |
| 3 – satisfactory                                                                                                                                                                                       |                                  |
| 4 – sufficient                                                                                                                                                                                         |                                  |
| 5 – poor                                                                                                                                                                                               |                                  |
| 6 – insufficient                                                                                                                                                                                       |                                  |
| In my opinion students in 1st and 2nd grade are ...                                                                                                                                                    |                                  |
| very able to perform supervised self-tests with Salivettes                                                                                                                                             | 16 (94%)                         |
| able to perform testing with Salivettes                                                                                                                                                                | 1 (6%)                           |
| partially able to perform testing with Salivettes                                                                                                                                                      |                                  |
| rather unable to perform testing with Salivettes                                                                                                                                                       |                                  |
| mostly unable to perform testing with Salivettes                                                                                                                                                       |                                  |
| In my opinion students in 3rd and 4th grade are ...                                                                                                                                                    |                                  |
| very able to perform self-testing with Salivettes                                                                                                                                                      | 17 (100%)                        |
| able to perform testing with Salivettes                                                                                                                                                                |                                  |
| partially able to perform testing with Salivettes                                                                                                                                                      |                                  |
| rather unable to perform testing with Salivettes                                                                                                                                                       |                                  |
| mostly unable to perform testing with Salivettes                                                                                                                                                       |                                  |
| I would rate the <i>Virenwächter 3.0</i> test concept (i.e. instruction of voluntary school staff members, online registration of samples at school etc.) as follows:                                  |                                  |
| Very good                                                                                                                                                                                              | 13 (77%)                         |
| Good                                                                                                                                                                                                   | 3 (18%)                          |
| Indifferent                                                                                                                                                                                            | 1 (6%)                           |
| Bad                                                                                                                                                                                                    |                                  |
| Very bad                                                                                                                                                                                               |                                  |
| The study information and online registration website were translated into several languages during the course of the study. I think the translation into several languages was...                     |                                  |
| extremely important                                                                                                                                                                                    | 10 (59%)                         |
| very important                                                                                                                                                                                         | 5 (29%)                          |
| rather important                                                                                                                                                                                       | 1 (6%)                           |
| somewhat important                                                                                                                                                                                     |                                  |
| not important at all.                                                                                                                                                                                  | 1 (6%)                           |
| To increase voluntary participation rate, the electronic notification of test results (sample tracking message after laboratory arrival, text message and email with personalized test result) was ... |                                  |

|                                                                                                                                                                                                                                | Number of primary schools (n=17) |
|--------------------------------------------------------------------------------------------------------------------------------------------------------------------------------------------------------------------------------|----------------------------------|
| extremely important                                                                                                                                                                                                            | 10 (59%)                         |
| very important                                                                                                                                                                                                                 | 5 (29%)                          |
| rather important                                                                                                                                                                                                               | 1 (6%)                           |
| somewhat important                                                                                                                                                                                                             |                                  |
| not important at all                                                                                                                                                                                                           | 1 (6%)                           |
| I wish to continue with Salivette-testing in our primary school                                                                                                                                                                |                                  |
| Yes                                                                                                                                                                                                                            | 13 (77%)                         |
| No                                                                                                                                                                                                                             |                                  |
| Don't know                                                                                                                                                                                                                     | 4 (24%)                          |
| I believe that the Salivettes are an appropriate self-testing tool for home-testing<br>(i.e. children perform Salivette testing at home under supervision of their<br>parents and subsequently bring the Salivettes to school) |                                  |
| Agree                                                                                                                                                                                                                          | 8 (47%)                          |
| Rather agree                                                                                                                                                                                                                   | 4 (24%)                          |
| Neither agree nor disagree                                                                                                                                                                                                     | 1 (6%)                           |
| Rather disagree                                                                                                                                                                                                                | 2 (12%)                          |
| Disagree                                                                                                                                                                                                                       | 2 (12%)                          |
| Comments                                                                                                                                                                                                                       |                                  |
| When comparing antigen rapid tests and Salivette tests I think that Salivette<br>tests are ...                                                                                                                                 |                                  |
| much better.                                                                                                                                                                                                                   | 15 (88%)                         |
| somewhat better.                                                                                                                                                                                                               | 2 (12%)                          |
| neither better nor worse.                                                                                                                                                                                                      |                                  |
| somewhat worse.                                                                                                                                                                                                                |                                  |
| much worse.                                                                                                                                                                                                                    |                                  |
