# Supplementary material for: SARS-CoV-2 Saliva Mass Screening in Primary Schools: A 10-Week Sentinel Surveillance Study in Munich, Germany
Source: MDPI journal article supplement (doi:10.3390/diagnostics12010162), 2022-01-11
Supplement: s1 [file s1]

**Supplementary Table S2:** Aggregated results of an online questionnaire on adherence to infection control measures in participating primary schools. The survey was completed by each school's principal after study week 10. Survey participation rate was 100%. Absolute numbers and percentages (%) are displayed.

|                                                                                                   | <b>Number of primary schools (n=17)</b> |
|---------------------------------------------------------------------------------------------------|-----------------------------------------|
| Primary schools adhering to infection control measures                                            | 17 (100%)                               |
| Supervision of children in half-size groups                                                       | 12 (71%)                                |
| Physical distancing (> 1.5 m) between staff members inside school building                        | 15 (88%)                                |
| Physical distancing (> 1.5 m) between staff members outside school building                       | 13 (77%)                                |
| Physical distancing (> 1.5 m) between children inside school building                             | 12 (71%)                                |
| Physical distancing (> 1.5 m) between children outside school building                            | 12 (71%)                                |
| Face mask for staff members inside school building                                                | 17 (100%)                               |
| Face mask for staff members outside school building                                               | 17 (100%)                               |
| Face mask for staff members during drop-off/pick-up of children                                   | 16 (94%)                                |
| Face mask for parents during drop-off/pick-up of children                                         | 17 (100%)                               |
| Other protection measures (e.g. protection glass, face shield)                                    | 9 (53%)                                 |
| Limited number of people/parents allowed on school premises when dropping off/picking up children | 11 (65%)                                |
| Washing hands before dropping off children                                                        | 8 (47%)                                 |
| Separate use of bathroom facilities for individual groups/classes                                 | 8 (47%)                                 |
| Closure of garden/playground areas/common rooms                                                   | 2 (12%)                                 |
| Separate use of garden/playground areas for individual groups/classes                             | 15 (88%)                                |
| Handwashing before meals                                                                          | 16 (94%)                                |
| Handwashing before entering classes                                                               | 16 (94%)                                |
| Hand disinfectant dispensers provided on premises                                                 | 10 (59%)                                |
| Cancellation of common activities (parties, trips, bazaars etc.)                                  | 15 (88%)                                |
| Hygiene training for students and school staff                                                    | 9 (53%)                                 |
