# Supplementary material for: SARS-CoV-2 Saliva Mass Screening in Primary Schools: A 10-Week Sentinel Surveillance Study in Munich, Germany
Source: MDPI journal article supplement (doi:10.3390/diagnostics12010162), 2022-01-11
Supplement: s1 [file s1]

**Supplementary Table S1:** Classification of RT-qPCR laboratory test results. Abbreviations: N, Ct-value N-Gene; E, Ct-value E-Gene; NA, not applicable/not detected.

|                                    |                                                                                                |
|------------------------------------|------------------------------------------------------------------------------------------------|
| <b>Positive</b>                    | $N \leq 35 \ \& \ E \leq 33$ or $N \leq 35 \ \& \ E > 33$ or $N > 35 \ \& \ E \leq 33$         |
| <b>Inconclusive</b>                | $N > 35 \ \& \ E > 33$ or $N \leq 35 \ \& \ E = \text{NA}$ or $N = \text{NA} \ \& \ E \leq 33$ |
| <b>Negative</b>                    | $N > 35 \ \& \ E = \text{NA}$ or $N = \text{NA} \ \& \ E > 33$ or $N \ \& \ E = \text{NA}$     |
| <b>Variant without distinction</b> | Mutations N501Y and A570D not determined                                                       |
| <b>Variant B.1.1.7</b>             | Mutations N501Y and A570D determined                                                           |
| <b>Variant B.1.351 or B.1.1.28</b> | Mutation N501Y determined                                                                      |
| <b>Variant inconclusive</b>        | Positive classification based on N and E without clear determination of variant                |
| <b>Invalid</b>                     | No signal in internal PCR control/insufficient saliva/technical error                          |
