# Supplementary material for: SARS-CoV-2 Saliva Mass Screening in Primary Schools: A 10-Week Sentinel Surveillance Study in Munich, Germany
Source: Diagnostics (Basel). 2022 Jan 11;12(1):162. doi: 10.3390/diagnostics12010162 (PMC8774979; doi:10.3390/diagnostics12010162)
Supplement: Supplementary file 1 [file diagnostics-12-00162-s001.zip]

Archive with 5 entries (5 files):
- supplementary_TableS2_11_25.pdf
- supplementary-FigureS1_11_25.pdf
- supplementary-FigureS2_11_25.pdf
- supplementary-TableS1_11_25.pdf
- supplementary-TableS3_11_25.pdf
