# Supplementary figures and images for: SARS-CoV-2 Saliva Mass Screening in Primary Schools: A 10-Week Sentinel Surveillance Study in Munich, Germany
Source: MDPI journal article supplement (doi:10.3390/diagnostics12010162), 2022-01-11

**Supplementary Figure S1: Study sample flow**

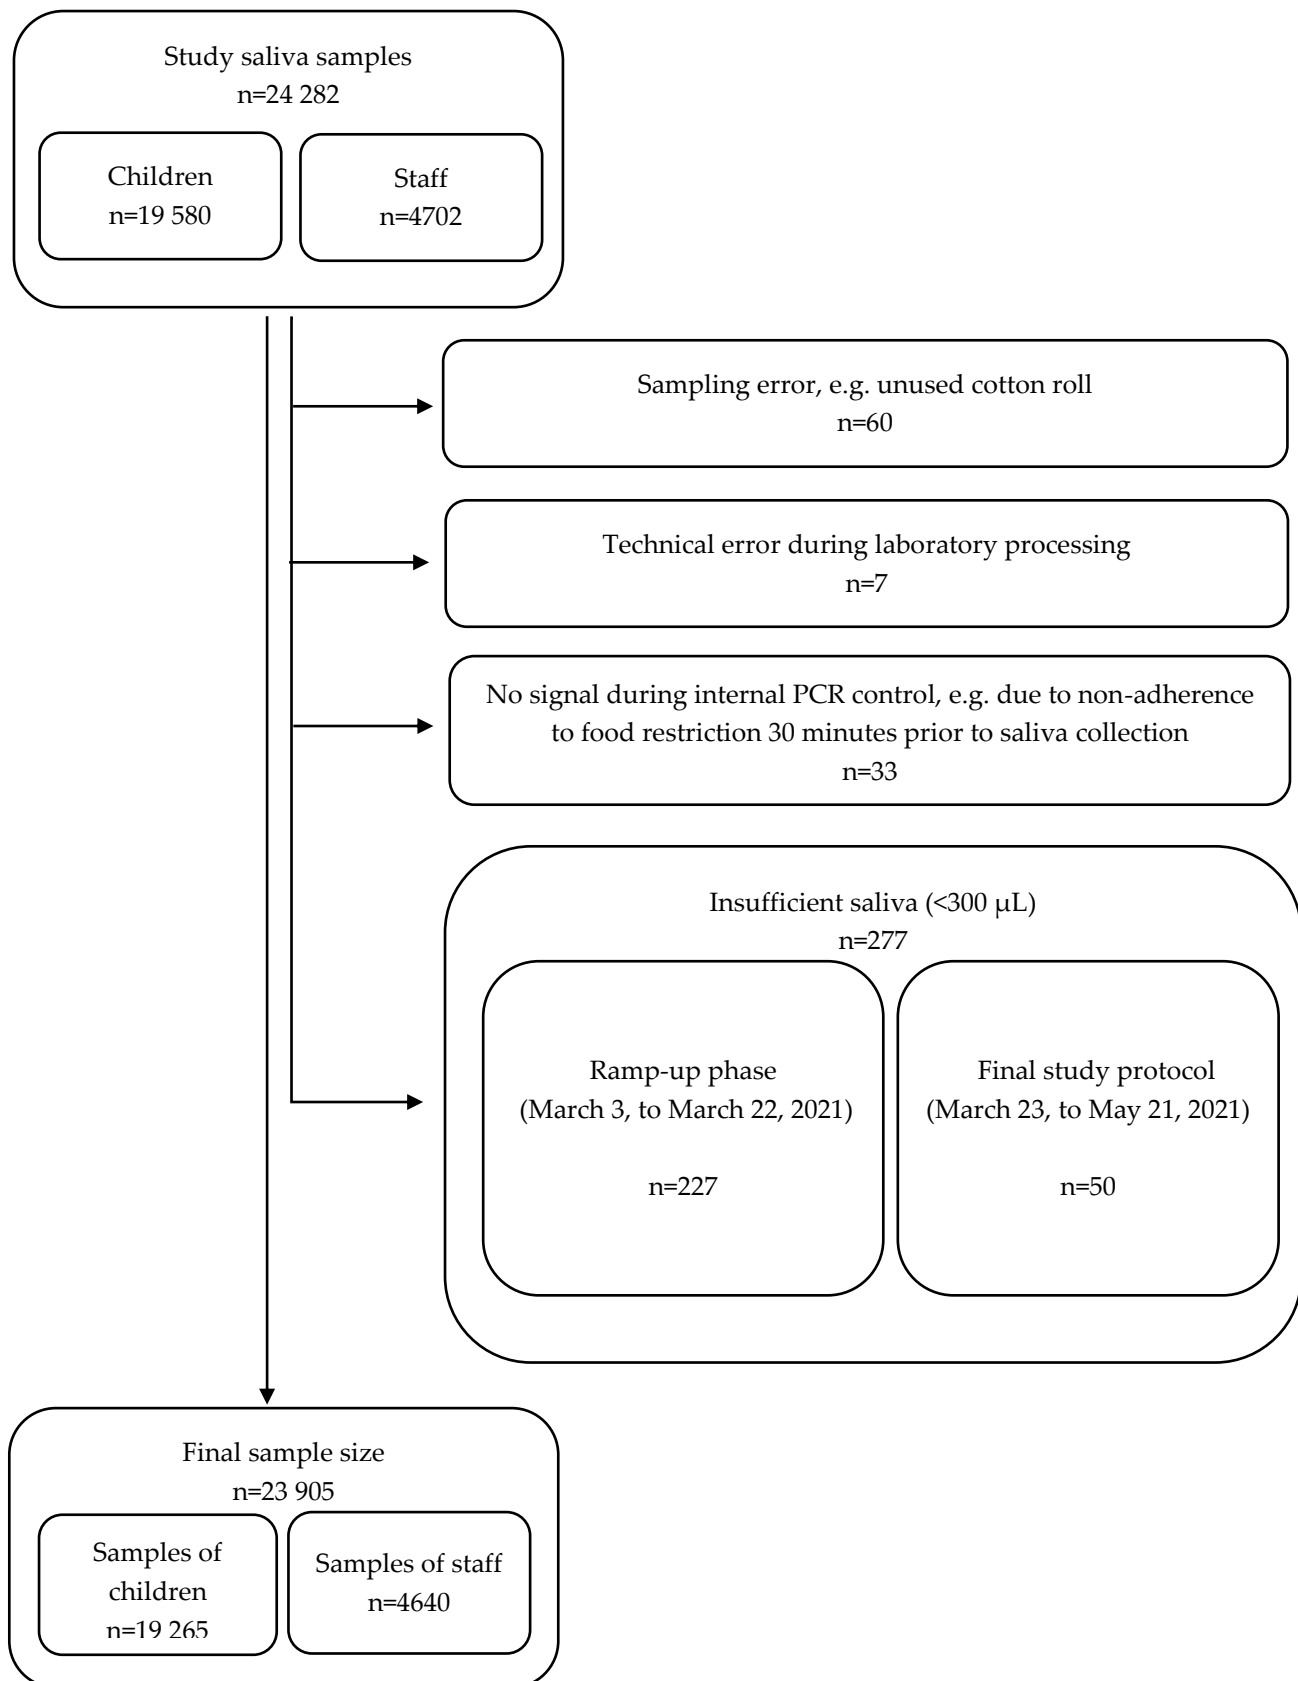

Supplement: s1 [file s1]
